# 1 **GenoTriplo: A SNP genotype calling method for triploids**

2 **Roche Julien<sup>a,b</sup>, Besson Mathieu<sup>b</sup>, Allal François<sup>c</sup>, Haffray Pierrick<sup>b</sup>, Patrice**

3 **Pierre<sup>b</sup>, Vandeputte Marc<sup>c</sup>, Phocas Florence<sup>a</sup>**

4 <sup>a</sup> Université Paris-Saclay, INRAE, AgroParisTech, GABI, 78350 Jouy-en-Josas, France

5 <sup>b</sup> SYSAAF (French Poultry and Aquaculture Breeders Technical Centre), 35042, France

6 <sup>c</sup> MARBEC, University of Montpellier, CNRS, Ifremer, IRD, INRAE, 34250 Palavas-les-Flots, France

7

## 8 **Keywords**

9 Single nucleotide polymorphism, genotype calling, genotype clustering, triploids, polyploids, R  
10 package

## 11 **Abstract**

12 Triploidy is very useful in both aquaculture and some cultivated plants as the induced sterility helps  
13 to enhance growth and product quality, as well as acting as a barrier against the contamination of  
14 wild populations by escapees. To use genetic information from triploids for academic or breeding  
15 purposes, an efficient and robust method to genotype triploids is needed. We developed such a  
16 method for genotype calling from SNP arrays, and we implemented it in the R package named  
17 GenoTriplo. Our method requires no prior information on cluster positions and remains unaffected  
18 by shifted luminescence signals. The method relies on starting the clustering algorithm with an initial  
19 higher number of groups than expected from the ploidy level of the samples, followed by merging  
20 groups that are too close to each other to be considered as distinct genotypes. Accurate classification  
21 of SNPs is achieved through multiple thresholds of quality controls. We compared the performance  
22 of GenoTriplo with that of fitPoly, the only published method for triploid SNP genotyping with a free  
23 software access. This was assessed by comparing the genotypes generated by both methods for a  
24 dataset of 1232 triploid rainbow trout genotyped for 38,033 SNPs. The two methods were consistent

25 for 89% of the genotypes, but for 26% of the SNPs, they exhibited a discrepancy in the number of  
26 different genotypes identified. For these SNPs, GenoTriplo had >95% concordance with fitPoly when  
27 fitPoly genotyped better. On the contrary, when GenoTriplo genotyped better, fitPoly had less than  
28 50% concordance with GenoTriplo. GenoTriplo was more robust with less genotyping errors. It is also  
29 efficient at identifying low-frequency genotypes in the sample set. Finally, we assessed parentage  
30 assignment based on GenoTriplo genotyping and observed significant differences in mismatch rates  
31 between the best and second-best couples, indicating high confidence in the results. GenoTriplo  
32 could also be used to genotype diploids as well as individuals with higher ploidy level by adjusting a  
33 few input parameters.

## 34 **Author Summary**

35 To cultivate plants, fish and shellfish more profitable for both farmers and consumers, one can utilize  
36 individuals one can utilize individuals with three chromosome sets instead of the two found in fertile  
37 populations that are diploids. These individuals, called triploids, are generally sterile and then often  
38 exhibit higher growth and quality of products, such as seedless fruits or better flesh quality for fish  
39 and shellfish. To be able to improve performances of the sterile triploids by selective breeding, it is  
40 important to know the versions of the genes present in the three chromosome sets of triploids. Until  
41 now, few methods existed to identify these three versions, and none have been demonstrated as  
42 sufficiently effective. It is the reason why we developed the GenoTriplo software. We demonstrate in  
43 this paper the possibility to accurately genotype triploids, as well as how it can be used to  
44 reconstruct pedigree information of triploid progeny. Ultimately, we expect that it can help select for  
45 reproduction the parents that have the best triploid progeny for the traits of interest such as growth,  
46 vigour or product quality.

47

## 48 Introduction

49 Polyploidy, characterized by the presence of three or more sets of chromosomes in the nucleus, is a  
50 phenomenon that occurs spontaneously across various taxa in the tree of life, spanning from plants  
51 [1–3] to vertebrates [4]. Certain forms of polyploidy, such as triploidy, exhibit noteworthy attributes  
52 relevant to agricultural practices. Triploid individuals, possessing three sets of chromosomes, are  
53 generally sterile, impeding the production of sexual tissues and yielding favourable outcomes for  
54 farmers. In horticulture, the cultivation of seedless fruits is facilitated by the sterility of triploids, a  
55 characteristic appreciated by consumers [5]. Triploidy has also been reported to enhance growth rate  
56 and vigour in plants [6]. In aquaculture, triploid fish demonstrate an accelerated growth rate due to  
57 the energy savings stemming from the lack of sexual maturation [7]. Additionally, the enhanced flesh  
58 quality of triploid fish and shellfish is attributed to the prevention of gonadal maturation [8,9]. From  
59 an environmental perspective, the sterility of triploids serves as a barrier against the contamination  
60 of wild genotypes by selectively bred genotypes in instances of contact between these populations  
61 [10]. Triploidy also can act as a safeguard against theft of genetic progress among competing  
62 producers.

63 The induction of triploidy has been achieved in various plant species [11], like citrus [5] and mulberry  
64 [12], as well as in shellfish such as oysters [13] and in finfish, in particular rainbow trout [14,15].

65 While triploids present advantages over diploids, their widespread production in aquaculture  
66 necessitates that selective breeding programs consider their specific performance. Breeding  
67 programs obviously require fertile broodstock, and are thus performed with diploid selection  
68 candidates. In order to maximize genetic gains on desired traits for triploid production however, it  
69 would be necessary to incorporate the performance of triploids sibs in the evaluation of breeding  
70 values. Indeed, evaluating only diploid performance may be suboptimal as the genetic correlation for  
71 the same trait between diploids and triploids may differ from unity [16–18]. In mixed-family  
72 aquaculture breeding programs, families are mixed at hatching and their pedigree is recovered *a*

73 *posteriori* using genomic markers [19]. In such designs, selecting for triploid performance implies to  
74 be able to genotype triploids and recover their pedigree, in order to be able to rank diploid selection  
75 candidates using breeding values from their triploid sibs.

76 Technically, two platforms, Illumina and Affymetrix, have been used for genotyping SNP arrays in  
77 both diploid [20] and polyploid species [21]. As reported by [21], genotype calling is complicated for  
78 polyploids because these species have more possible genotypes at a SNP locus than diploid species  
79 do (homozygote with reference allele, heterozygote, and homozygote with alternative allele).  
80 Theoretically, the number of genotypes can be up to  $p+1$  in a species with a ploidy level of  $p$  (i.e. 4 in  
81 triploids, 5 in tetraploids, ...). So far, genotype calling software accompanying genotyping platforms  
82 cannot identify more than 5 clusters for Illumina and 3 clusters for Affymetrix. More specifically, the  
83 GenomeStudio software from Illumina is able to provide 5 clusters, but it requires manual  
84 adjustment of the cluster boundaries for each marker, which is impractical to use for SNP arrays with  
85 several tens of thousands SNP. The Axiom Analysis Suite (AXAS) software, widely used in both plant  
86 and fish species, is only designed for genotype calling on diploid luminescence output files from the  
87 Thermo Fisher Affymetrix platform, and does not currently support triploids. Up to 2020, there were  
88 only two publicly available software, fitTetra and ClusterCall, initially written for tetraploids [22],  
89 which could call up over three genotypes using output files with allelic signals from SNP array  
90 genotyping platforms. Another software, SuperMASSA, was written for genotype calling from  
91 Genotype-By-Sequencing data for all ploidies [22]. Many methods struggle with low-frequency  
92 genotypes [23] or lack permissiveness when faced with allelic signal shifts in polyploids [24,25]. For  
93 autopolyploids, such as induced triploids in aquaculture, the major complication is distinguishing  
94 between different allele dosages (AAA, AAB, ABB, BBB), as in this case only two alleles per locus are  
95 normally present in their diploid parents.

96 Therefore, limited options for genotype calling in triploids exist [26] and open source tools are even  
97 more rare. As far as we know, only the R package fitTetra, initially developed for tetraploid

98 individuals [27,28], has been implemented in a more advanced version of the package called fitPoly  
99 to consider any other level of auto-polyploidy. However, our first trial yielded some inconsistent  
100 results using fitPoly to genotype triploids in rainbow trout. Therefore, the first objective of this study  
101 was to devise a clustering method for a better genotype calling of triploid individuals and to compare  
102 our results to those of fitPoly genotype calling on our rainbow trout study case. The second objective  
103 was to implement and disseminate this new method through an R package deposited on the CRAN to  
104 ensure its free accessibility.

105

## 106 **Materials & Methods**

### 107 **Available dataset**

108 To develop this novel genotype calling method for triploids, we used the allelic signals produced by  
109 Thermo Fisher Affymetrix platform for a French research project on genomic selection in rainbow  
110 trout [29]. The experimental stock was established from 190 dams and 98 sires of a commercial  
111 selected all-female line of Aquaculteurs Bretons breeding company (Plouigneau, France) and 1232  
112 triploid offspring and the 190 dams and 98 sires were genotyped for 57,501 SNPs using the medium-  
113 density Rainbow Trout Axiom<sup>®</sup> 57K SNP array from Thermo Fisher [30]. We retained the allelic signals  
114 for 38,033 high quality markers present in both SNP array [31,32]. Luminescence values of probsets A  
115 and B ( $S_A$  and  $S_B$ ) for each marker and individual were obtained through the AXAS software.

### 116 **Clustering algorithm**

117 The clustering process aimed at grouping individuals that share the same genotype. To enhance the  
118 efficiency of the clustering method, variable(s) given to the algorithm must be chosen carefully so the  
119 different genotypes are well separated along the axe(s) [25]. In our approach, we decided to use 2  
120 variables (and so 2 axes): the contrast (Eq.1) and the signal strength (Eq. 2), commonly used by AXAS  
121 for diploids.

$$x = Contrast = \log_2 \left( \frac{S_A}{S_B} \right) \quad (Eq. 1)$$

$$y = Signal Strength = \frac{\log_2(S_A) + \log_2(S_B)}{2} \quad (Eq. 2)$$

122 Thus, each individual was represented by a pair of coordinates (x, y) for each marker (Fig 1, Stage 1).

123 For each SNP, the Rmixmod clustering package (version 2.1.8) [33] was then used on R software

124 (version 4.3.1) [34] to find clusters among individuals for a given marker, with no prior information.

125 The clustering function of Rmixmod initiates the process by randomly picking individuals as starting

126 point and uses an expectation-maximization algorithm (EM) to probabilistically update parameters of

127 the clusters (mean, variance, weight).  $N_{init}$  initializations were performed and the one that maximized

128 likelihood passed to the next steps.

129 During the initialization phase, the clustering function of Rmixmod was asked to find  $N_{clus}$  clusters

130 among individuals with  $N_{clus}$  greater or equal to the number of possible genotypes for a given SNP (4

131 in our case) (Fig 1, Stage 2).  $N_{clus}$  values of 4, 8 or 12 were tested to find an optimal value.

132 When the algorithm failed to find  $N_{clus}$  clusters among individuals (failure of the EM algorithm to

133 converge with  $N_{clus}$  clusters), it was restarted with  $N_{clus}=N_{clus}-1$  clusters and so on, until the algorithm

134 converged and a non-error solution was obtained. For these retries,  $N_{init}$  was automatically reduced

135 by 2 (with a minimum value of 1) to limit computing time. Indeed, when the algorithm failed to find

136 the initial number of  $N_{clus}$  clusters, it was likely that the marker did not display all possible genotypes.

137 Thus, a high  $N_{init}$  was not necessary to find a suitable solution.

138 As the final  $N_{clus}$  might be higher than the maximum number of genotypes, a single genotype could

139 be divided into different clusters. If more than 4 clusters remained (the maximum number of

140 genotypes in triploids), or if two clusters were too close to be considered as distinct genotypes, the

141 two clusters with the weakest distance in Contrast value were merged into a single one (Fig 1, Stage

142 3 to Stage 4). Two clusters were declared as too close if:

$$D_{Clus1,Clus2} < 0.28 * (1 + abs(\frac{Contrast_{clus1} + Contrast_{clus2}}{2})) \quad (Eq. 3)$$

$$\text{Where, } Contrast_{clusi} = Mean(x_{indiv_{clusi}}) \quad (Eq. 4)$$

$$\text{And, } D_{clus1,clus2} = abs(Contrast_{clus1} - Contrast_{clus2}) \quad (Eq. 5)$$

143 Where  $D_{Clus1,Clus2}$  represented the distance between the center of cluster 1 and the center of cluster 2  
144 in Contrast value (abscissa), and  $Contrast_{clusi}$  represented the mean Contrast value of cluster  $i$ . As the  
145 standard deviation along the Contrast axis of a genotype increased when  $Contrast_{clusi}$  moved away  
146 from 0 (to positive or negative value), the distance criteria to merge clusters had to increase the  
147 more  $Contrast_{clus1}$  and  $Contrast_{clus2}$  differed from 0. The factor of 0.28 was empirically determined  
148 using a trial and error assay.

149 To assess the impact of the number of initializations i.e. random starting points on the final  
150 clustering, the algorithm was tested with three modalities for  $N_{init}$ : 1, 5 and 10 different  
151 initializations.

152 The algorithm was also tested for three other modalities to assess the impact of  $N_{clus}$  on the  
153 outcome: 4, 8 and 12, i.e. a number greater or equal to the number of possible genotypes for a given  
154 SNP (4 in our case). Other existing methods for genotyping usually look for a maximum number of  
155 clusters which exactly corresponds to the number of possible genotypes. However, by increasing the  
156 initial number of clusters (8 and 12), we aimed to enable the algorithm to identify clusters gathering  
157 only a few individuals, which can happen frequently in case of a low frequency genotype.

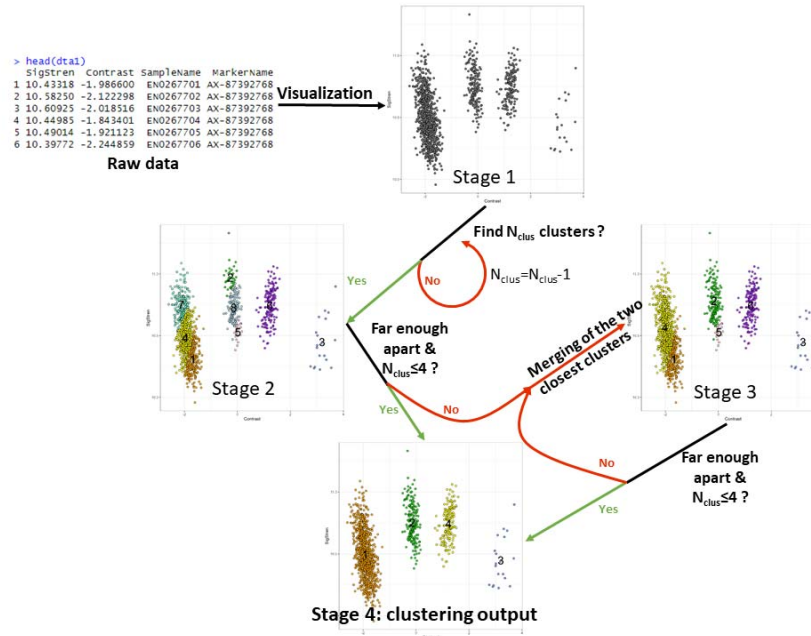

158

159 Figure 1: Algorithm stages for the clustering phase

## 160 Genotype calling

161 Two situations must be accounted for to assign genotypes to clusters depending on the origin of the  
 162 samples: i) either all samples originated from a same population or ii) they come from various  
 163 populations that can be genetically distant. The right situation must be specified to our algorithm as  
 164 they involve different hypotheses. In our case, the samples originated from a single population, and  
 165 we only used the corresponding method for genotype calling.

166 In the situation of a unique population, genotypes were attributed by considering the mean Contrast  
 167 of each cluster and its position relative to other clusters. The most extreme cluster, identified by the  
 168 absolute value of its contrast mean ( $x$ ), was designated as a homozygous genotype (AAA if  $\text{mean}(x) > 0$   
 169 and BBB if  $\text{mean}(x) < 0$ ) (Fig 2). Other clusters were ordered by their mean contrast values, and  
 170 genotypes were subsequently assigned based on the first cluster that had been assigned (Fig 2). For  
 171 example, if the mean contrast was positive for the most extreme cluster (i.e. assigned as AAA),  
 172 genotypes were then assigned depending on their mean contrast values in the order AAB, ABB and  
 173 BBB, from the closest to the furthest cluster from the AAA homozygous genotype. On the contrary, if



174 the mean contrast was negative for the most extreme cluster (i.e. assigned as BBB), genotypes were  
 175 then assigned depending on their mean contrast values in the order BBA, BAA and AAA, from the  
 176 closest to the furthest cluster from the BBB homozygous genotype (Fig 2).

177 We assumed that when the outcome of clustering was a single cluster for a given SNP, it could only  
 178 correspond to a homozygous genotype; 2 or 3 clusters indicated a homozygous genotype and the  
 179 closest heterozygous or the two heterozygous genotypes; and 4 clusters represented all 4 possible  
 180 genotypes for triploids. Note that our algorithm can also be used for genotype calling in diploids as  
 181 the same reasoning could be applied with a maximum of 3 possible genotypes for diploids as long as  
 182 it is specified in the input parameters to the algorithm.

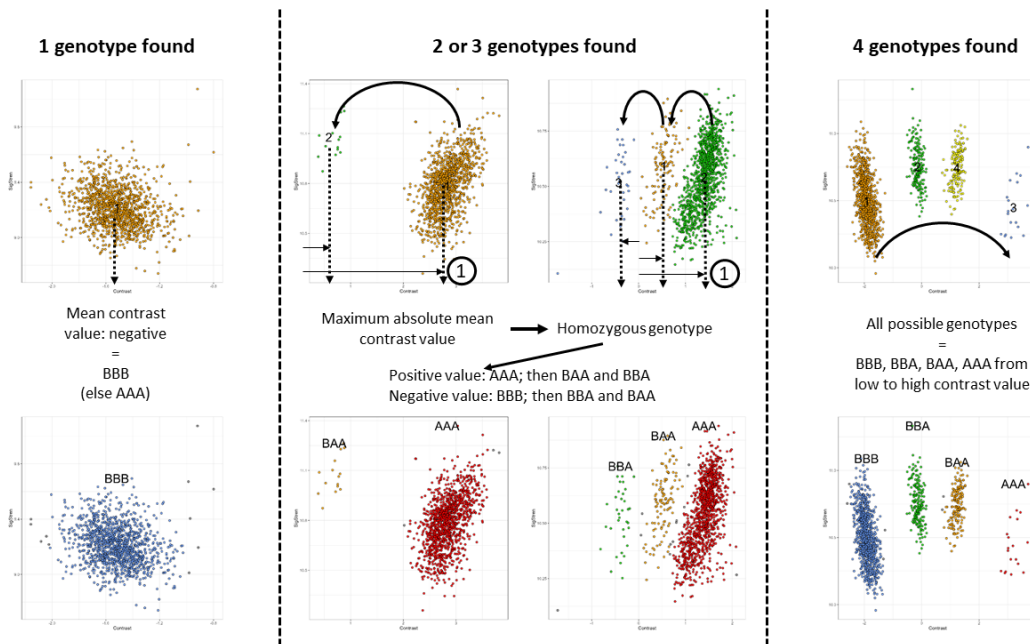

183

184 Figure 2: Illustration of genotype determination for 1; 2 or 3; and 4 clusters identified for a given SNP

185 In case of 3 clusters encountered for a given SNP in triploids, an additional step was added to address  
 186 the case of a highly shifted signal. This implies markers where genotypes are all shifted toward either  
 187 positive or negative contrast value making, leading to having a cluster corresponding to a  
 188 heterozygous genotype in the most extreme position, and thus being wrongly identified as a cluster  
 189 corresponding to a homozygous genotype. To minimize the error due to that rare behaviour, if the

190 most extreme cluster had less than half the number of individuals as the opposing cluster, it was  
191 assigned as a heterozygous genotype, and the opposite cluster was designated as the homozygous  
192 genotype (Fig 3, Before to After). In this case however, the next step of the algorithm concerning SNP  
193 quality control and decision criterion to retain or remove a SNP would frequently reject the marker.  
194 However, we had to first decide the most likely genotypes in this case. In a population in which the  
195 number of apparent AAA is less than half the number of apparent ABB (equivalent to  $\text{freqA} < 0.55$ )  
196 (ex. Fig 3), the probability to have no BBB in the population ( $\text{freqB} \geq 0.46$ ) is extremely low as the  
197 expected frequency of BBB is  $\geq 0.1$ , i.e. it is more probable that apparent AAA might be an AAB  
198 shifted genotype and apparent ABB might be a BBB shifted genotype. In this corrected situation, the  
199 frequency of A was less than 0.2 making the AAA genotype extremely rare (with an expected  
200 frequency  $< 0.01$  and even not present here) and B higher than 0.8 (explaining the high number of  
201 BBB) (Fig 3).

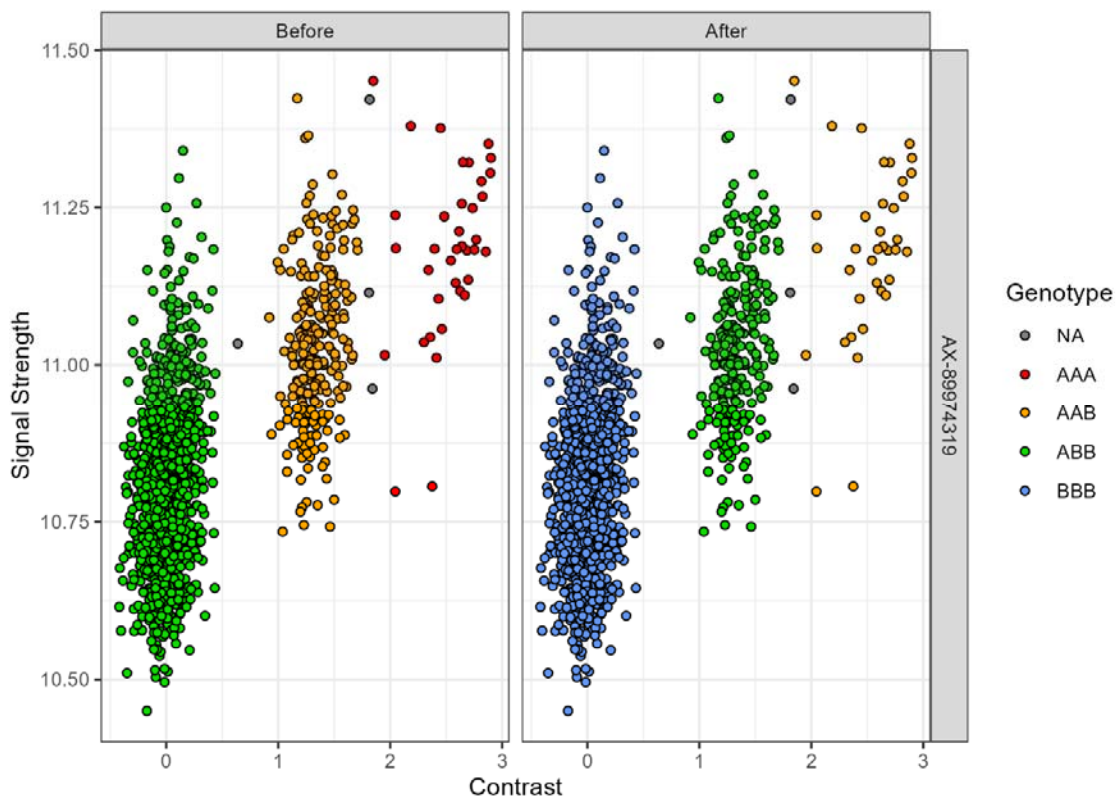

202

203 Figure 3: Example of implementation of the additional step to account for highly shifted contrast  
204 signal

205 In the situation where samples originate from distinct populations, there is an additional issue to  
206 solve for genotype calling when only two clusters are identified for a SNP. In that case, it is likely that  
207 the two clusters correspond to the two homozygous genotypes and not to a SNP to be put in the rare  
208 category of “No Minor homozygote”. Indeed, the SNP is likely to be monomorphic within a given  
209 population, but different populations may have fixed alternative alleles.

210 To solve this case, we used the approach proposed by [26]. We derived reference values for the  
211 mean contrasts of all possible genotypes by averaging them across markers with the maximum  
212 number of clusters identified (i.e. 4 for triploids). These reference values were used to attribute  
213 genotypes for the remaining markers (with a number of clusters below the maximum). For these  
214 latter markers, the mean contrast of each cluster was compared to the reference set of values, and  
215 the genotype was assigned based on the closest reference value. If two clusters pointed to the same  
216 reference value, the genotypes were assigned based on their relative positions. For example, if two  
217 clusters pointed toward the negative reference value corresponding to BBB homozygote, the one  
218 with the most negative contrast was assigned to the BBB homozygote while the other was assigned  
219 to the nearest possible heterozygous genotype BBA.

220 All the steps of our algorithm (from clustering to genotype calling) can also be used for diploids as the  
221 approach can be applied with a maximum of 3 possible genotypes for diploids by indicating the  
222 ploidy level of the population under study.

### 223 **Quality control for genotypes and SNP categorization**

224 Following the approach proposed by AXAS, seven criteria were employed to enhance cluster  
225 precision and identify low-quality markers in the genotype calling phase. Three criteria were used to  
226 decide whether or not individuals or clusters were assigned to a given genotype or not assigned (NA):

227 1) No call for individuals. During clustering, individuals were assigned to a cluster number with a  
228 certain probability. Individuals with a probability of belonging to their cluster below 0.85 for a given  
229 marker were marked as NA to limit incorrect genotyping.

230 2) Distance between individual and its cluster center. This criterion aimed to avoid wrong genotyping  
231 by identifying individuals far from all clusters while still assigned to a cluster. The distance between  
232 an individual and the center of its cluster was monitored to not exceed 2.8 times the standard  
233 deviation of the cluster along the Contrast axis ( $SD_{cluster}$ ). An individual genotype was set to NA above  
234 this threshold. The choice of a 2.8 factor was based on the property that under the assumption of a  
235 normal distribution of individuals within a cluster, 99.5% of the observed values should fall within  
236  $\pm 2.8$  times the standard deviation. This factor can be modified in the R package to allow for more  
237 flexibility.

238 3) Cluster Standard Deviation ( $SD_{cluster}$ ). A cluster was set to NA if its  $SD_{cluster}$  exceed  
239  $0.28 * (1 + 0.5 * \text{abs}(\text{Mean}_{cluster}))$ . This criterion imposed a maximal standard deviation to a cluster to  
240 limit the risk of genotype calling for a cluster gathering multiple genotypes (in case the algorithm  
241 failed to do the correct clustering). The factor of 0.28 was empirically determined through a trial and  
242 error assay. The objective was to establish a minimal  $SD_{cluster}$  of 0.28 and to progressively increase  
243 this minimum as the cluster moved farther away from 0.

244 The remaining four criteria acted as filters to assess the SNP quality, similar to criteria implemented  
245 in the AXAS software, before categorization of the markers:

246 4) Marker Call Rate (CR). The minimum CR was fixed to 0.97.

247 5) Marker Fisher's Linear Discriminant (FLD). The FLD is a measure of the distance between the two  
248 nearest genotypes along the x axis (Contrast) and the quality of the clusters. It is defined as:

$$FLD = \frac{\text{abs}(\text{Contrast}_{Geno1} - \text{Contrast}_{Geno2})}{SD_{Geno1,Geno2}} \quad (\text{Eq. 6})$$

249 Where  $\text{Contrast}_{\text{Geno}i}$  represented the mean Contrast of genotype  $i$  and  $\text{SD}_{\text{Geno}1, \text{Geno}2}$  represented the  
250 pooled standard deviation of genotype 1 and 2. If the FLD was 3.4 or lower, two genotypes were  
251 considered too close to be reliable.

252 6) Marker Heterozygous Strength Offset (HetSO). The HetSO measures the offset between  
253 homozygous and heterozygous genotypes along the  $y$  axis (Signal Strength). Heterozygous clusters  
254 are expected to be positioned higher on the  $y$  axis than homozygous clusters (i.e. HetSO value  $> -0.3$ ).

255 7) Marker Homozygous Ratio Offset (HomRO). The HomRO represented the position of the  
256 homozygous cluster along the  $x$  axis (Contrast). The threshold value depended on the number of  
257 clusters like so: 0.6, 0.3, 0.3, -0.9 for 1, 2, 3 and 4 clusters, respectively (adapted from [35]).

258 Markers failing to pass one of these criteria were labelled according to the filter they failed: “Call rate  
259 below threshold” for call rate threshold, “Off target variant” for HetSO threshold, and “Others”  
260 otherwise. Those are rejected markers, meaning markers with low genotyping confidence that  
261 should not be used for further analyses.

262 Markers passing all four filters were categorized based on their number of genotypes: “Mono high  
263 resolution”, “No minor homozygote” and “Poly high resolution” for respectively, 1 genotype, 2 or 3  
264 genotypes, and 4 genotypes. Those are accepted markers, meaning markers with high genotyping  
265 confidence that could be used for further analyses.

## 266 **Comparison strategy between GenoTriplo and fitPoly**

267 To evaluate the efficiency of our method in contrast to an existing alternative, we conducted a  
268 comparative analysis between GenoTriplo and fitPoly, the sole package available on the CRAN that  
269 handles triploid genotyping.

270 First, we assessed the overall concordance between GenoTriplo and fitPoly by comparing the  
271 genotypes assigned by both methods per individual and marker. Then, we examined the number of  
272 genotypes identified by each method for all markers and categorized markers by a pair of integers

273 representing the respective number of genotypes identified by GenoTriplo and fitPoly (for instance  
274 category (2;3) corresponded to 2 genotypes found by GenoTriplo and 3 by fitPoly) separating  
275 markers in 16 categories.

276 Categories of equal integer pair (both methods found the same number of genotype) were visually  
277 and numerically compared based on the overall genotype concordance rate and the mean contrast  
278 value of each genotype for the 4 corresponding categories from (1;1) to (4;4). For the visual  
279 comparison, mean cluster position of each genotype for each marker was displayed on a graph to  
280 compare genotype global position for each 4 categories.

281 The genotypes given by GenoTriplo and fitPoly were compared marker-by-marker and the best one  
282 was noted based on human visual observation. This was done for all markers in categories gathering  
283 200 or more markers except when both methods found the same number of genotypes. Among the  
284 12 remaining categories, 8 were analysed.

285 For categories exceeding 1,000 markers, a subset of 1,000 random markers was retained for visual  
286 inspection.

287 For these 8 tested categories, we compared markers acceptance (when a marker passed all quality  
288 threshold) and rejection (when a marker did not reach all quality threshold) by the methods to  
289 identify any differences. For each category, markers were split into two groups according to the best  
290 method to genotype them (GenoTriplo or fitPoly) and an overall genotype concordance rate between  
291 the two methods for all the 16 categories was computed.

292 Both methods had high marker call rate on average (0.98 ( $\pm$  0.044) for GenoTriplo and 0.97 ( $\pm$  0.122)  
293 for fitPoly). To ensure fair comparison, all NA were removed and not considered as different between  
294 methods, recognizing that some NA may be attributed for quality purpose when samples did not  
295 clearly belong to a genotype while others may result from misidentification of clusters by one or the  
296 other method. This approach aimed to provide a robust comparison while considering the nuances of  
297 missing data especially for those methods that provided few NA.

## 298 **Parentage assignment assessment**

299 To validate the utility of GenoTriplo, we conducted a parentage assignment of the triploid individuals  
300 using the R package APIS with the newly available function that enables parentage assignment on  
301 triploids (<https://cran.r-project.org/web/packages/APIS/index.html>). The assignment was done using  
302 the 1,000 best markers selected based on their Minor Allele Frequency (MAF) and CR. These markers  
303 were chosen from the 32,325 markers that successfully passed through all applied filters, including  
304 “Poly high resolution”, “Mono high resolution” and “No minor homozygote”.

305 While the true parents of the offspring were not available to fully validate the parentage assignment,  
306 we had access to the mating plan, which is composed of 10 independent factorial matings, each  
307 being composed of 8 to 10 sires crossed one-by-one with 17 to 24 dams, producing a theoretical  
308 number of 1862 full-sib families (or 1862 valid parent pairs). However, parental assignment by  
309 exclusion considers all possible parental pairs from the 98 sires and 190 dams [36], and thus a  
310 theoretical number of  $98 \times 190 = 18620$  possible parent pairs, which is 10 times more than the valid  
311 ones. In case of inaccurate assignments, we would thus expect that approximately 9 out of 10 would  
312 fall out of the declared mating plan.

## 313 **R package and shiny application**

314 For enhanced accessibility, we developed a R package called ‘GenoTriplo’ available on CRAN. The  
315 package incorporates functions for executing both the clustering phase (‘Run\_Clustering’) and the  
316 genotype calling phase (‘Run\_Genotyping’). Additionally, to make the usage easier for beginners and  
317 experts, a shiny interface was implemented (‘launch\_GenoShiny’), organized into four steps.

318 First, the raw dataset from AXAS requires formatting before progressing through the clustering  
319 phase. A list of markers or/and a list of individuals can be provided to select specific markers or/and  
320 individuals.

321 The clustering phase starts with the refined dataset obtained at the previous step. Users are  
322 prompted to input the ploidy level (default set to 3) of the population and the number of cores for  
323 parallelization (default set to  $N_{\text{computer\_cores}}-2$ ). An option to fine-tune parameters is available through  
324 the 'Add more control' button, allowing adjustments of the number of initializations for the Rmixmod  
325 clustering function (default set to 5) and the minimal contrast distance between two clusters (default  
326 set to 0.28).

327 The genotype calling process is applied to the output of the clustering phase. Users have the option  
328 to provide a CSV file containing the correspondence between A/B signals of AXAS and ATCG bases.  
329 Inputs such as the ploidy of individuals (default set to 3), the number of cores for parallelization  
330 (default set to  $N_{\text{computer\_cores}}-2$ ), and whether or not individuals originate from the same population are  
331 requested (default set to same population). The latter is introduced for simplification, assuming that  
332 individuals from the same population cannot exhibit both homozygous genotypes without a  
333 heterozygote (as described in **Genotype Calling** section). This step provides flexibility with various  
334 adjustable parameters, including no-call threshold for individuals, distance between cluster centres,  
335 cluster standard deviation threshold, FLD threshold, HetSO threshold, and CR threshold for markers.

336 The final step is optional and enables users to visualize the genotyping results through graphs and  
337 statistics.

338 All graphics were made using ggplot2 [37] via R code [34].

339

## 340 **Results**

### 341 **Clustering and genotype calling phases**

342 A “Poly high resolution” marker was characterized by the maximum number of genotype and well-  
343 separated clusters (Fig 4, “Poly high resolution”) whereas a “No minor homozygote” marker shared  
344 these characteristics but lacked one of the homozygous genotypes (Fig 4, “No minor homozygote”).



345 Occasionally, despite apparent separation of clusters, they failed to meet all established thresholds  
346 and did not pass filters; for example, in Fig 4, “Others (FLD threshold)” exhibited a FLD of 3.36,  
347 slightly below the set threshold of 3.4.

348 The methodology demonstrated robustness in identifying issues related to the position of the  
349 heterozygote cluster (Fig 4, “Off target variant”), where the BBA genotype exhibited lower signal  
350 strength than the BBB genotype, and in detecting mixed or uncertain clusters by augmenting the  
351 number of NA among individuals between clusters (Fig 4, “Call rate below threshold”).

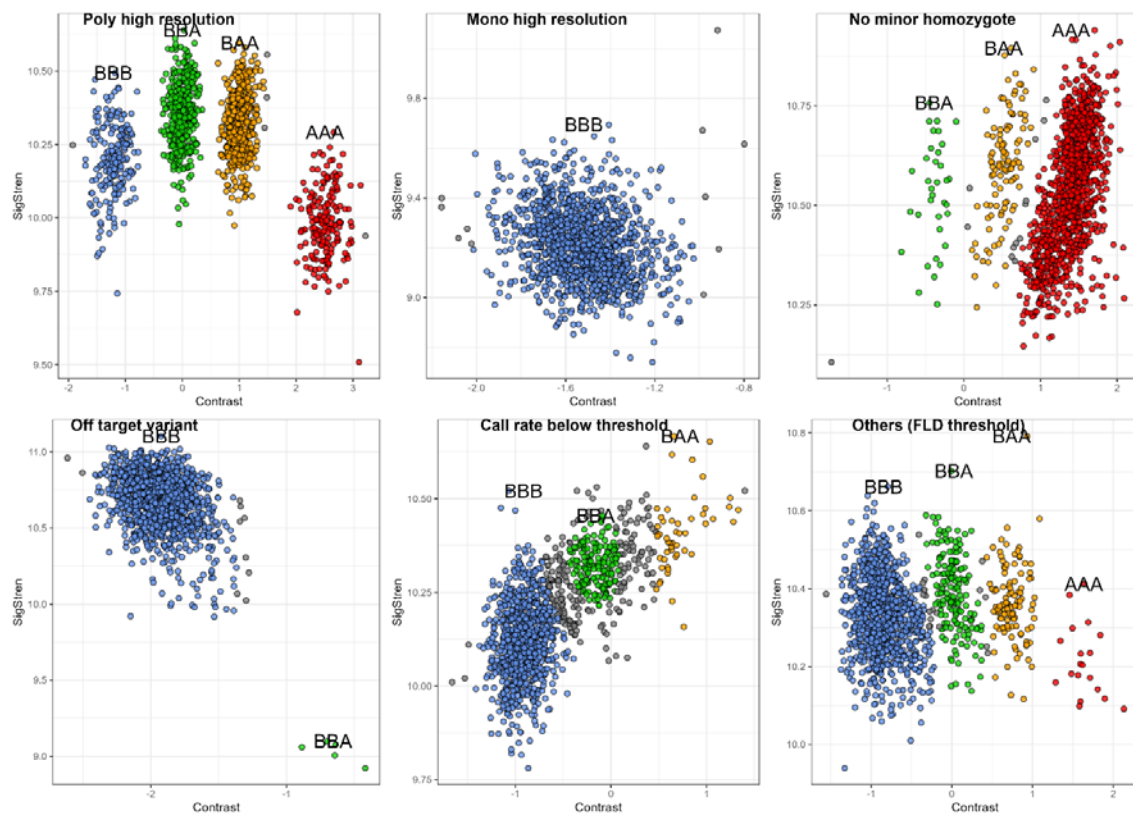

352

353 Figure 4: Examples of distribution on the axes of contrast and signal strength of genotypes identified  
354 by GenoTripro for each category of markers

355

356 **Number of initializations and maximal number of clusters**

357 To assess the impact of the numbers of initializations and of maximum clusters in GenoTripro, we  
358 conducted a quantitative comparison of the marker distribution across various categories following  
359 the completion of the clustering and genotyping phases.

360 The number of initializations positively impacted the performance of the algorithm. The number of  
361 markers in “Poly high resolution” category increased steadily from 1 to 10 initializations (+18% from  
362 1 to 5 and +5% from 5 to 10), while numbers in “No minor homozygote” and “Call rate below  
363 threshold” categories decreased. The supplementary “Poly high resolution” markers identified with  
364 10 initializations, compared to 5, originated partly from the “Call rate below threshold” category. This  
365 subset of markers may have encountered call rate issues due to cluster standard deviation  
366 thresholds. If the low-frequency genotype was not found, it might have been erroneously grouped  
367 with another genotype, significantly increasing the standard deviation of the cluster and resulting in  
368 NA assignments for all individuals in that cluster. Another subset originated from the “No minor  
369 homozygote” category, where individuals belonging to a smaller, low-frequency genotype might  
370 have been inaccurately grouped with a higher frequency genotype. This led to a lesser increase in  
371 standard deviation or NA assignments due to the distance-to-centre threshold. “Others” category  
372 showed less sensitivity to changes in the number of initializations (Table 1).

373 Increasing the initial number of clusters defined for Rmixmod clustering function also helped to get  
374 more markers included in the “Poly high resolution” category, especially when increasing from 4 to 8  
375 clusters and, to a lesser extent, from 8 to 12 clusters (Table 1). Conversely, the number of SNPs in the  
376 “No minor homozygote” category decreased, respectively from 8,480 to 4,452 markers with 4 and 12  
377 initial clusters, respectively. Notably, the number of markers in the “Mono high resolution” category  
378 decreased substantially for 12 clusters (3,132), while it remained stable around 4,300 for 4 and 8  
379 initial clusters. The number of markers in the “Call rate below threshold” category strongly decreased  
380 from 4 to 8 initial clusters (12,513 to 4,734), but increased from 8 to 12 initial clusters (4,734 to  
381 6,516), indicating an optimal number of initial clusters of 8 as compared to 4 and 12 clusters.

382 Although the number of SNPs put in “Others” category increased with the number of clusters, it did  
 383 not counterbalance the decrease of SNPs in “Call rate below threshold” category, indicating that  
 384 some markers were pulled out of the low-quality categories towards the high-quality categories  
 385 (Table 1).

386 In summary, utilizing 5 initializations, 8 clusters, and default parameters and thresholds for quality  
 387 control of the genotyping resulted in 85% of markers falling into high quality marker categories i.e.  
 388 “Mono high resolution”, “No minor homozygote” and “Poly high resolution”.

389 Table1: Number of markers by categories for the different parameters used in clustering phase

| Runs              |                   | Categories           |                     |                      |                           |                    |        |
|-------------------|-------------------|----------------------|---------------------|----------------------|---------------------------|--------------------|--------|
| N <sub>init</sub> | N <sub>clus</sub> | Poly high resolution | No minor homozygote | Mono high resolution | Call rate below threshold | Off target variant | Others |
| 1                 | 8                 | 18307                | 7126                | 4315                 | 7451                      | 411                | 423    |
| 5                 | 8                 | 21715                | 6233                | 4377                 | 4734                      | 421                | 553    |
| 10                | 8                 | 22501                | 5838                | 4299                 | 4344                      | 438                | 613    |
| 5                 | 4                 | 11867                | 8480                | 4612                 | 12513                     | 400                | 161    |
| 5                 | 12                | 22875                | 4452                | 3132                 | 6516                      | 403                | 655    |

390

### 391 Comparison between GenoTriplo and fitPoly genotyping

392 The overall concordance rate between genotypes derived from GenoTriplo and fitPoly was 85%,  
 393 reaching 89% after exclusion of all NA. Notably, 26% of the SNPs showed differences in the number  
 394 of genotypes identified by the two methods. GenoTriplo found less SNPs with four genotypes, while  
 395 fitPoly found less monomorphic SNPs (Table 2).

396 Table 2: Table with the respective number of SNPs with 1, 2 3 or 4 genotypes identified with  
 397 GenoTriplo or fitPoly.

| GenoTriplo\fitPoly | 1 genotype | 2 genotypes | 3 genotypes | 4 genotypes |
|--------------------|------------|-------------|-------------|-------------|
| 1 genotype         | 2333       | 1429        | 644         | 86          |
| 2 genotypes        | 28         | 493         | 542         | 783         |
| 3 genotypes        | 28         | 210         | 2289        | 4333        |
| 4 genotypes        | 38         | 640         | 966         | 23001       |

398

399 In categories for which both GenoTriplo and fitPoly identified the same number of genotypes, the  
400 genotype concordance was not as high as expected. For a single genotype found, the concordance  
401 was 25%, increasing to 81% with two genotypes found, 94% with three genotypes found, and  
402 exceeding 99% with four genotypes found. The difference in the case of a unique genotype assigned  
403 was due to fitPoly frequently assigning a heterozygous genotype rather than a more likely  
404 homozygous genotype. Out of 2428 markers with a single genotype assigned by fitPoly, 1752 were  
405 identified as heterozygous (Fig 5).

406 A similar pattern emerged, to a lesser extent, when fitPoly identified two genotypes. In contrast,  
407 GenoTriplo exhibited the expected behaviour, with each distinct genotype forming distinct clusters,  
408 displaying distinct mean contrast values regardless of the number of genotypes identified (Fig 5).

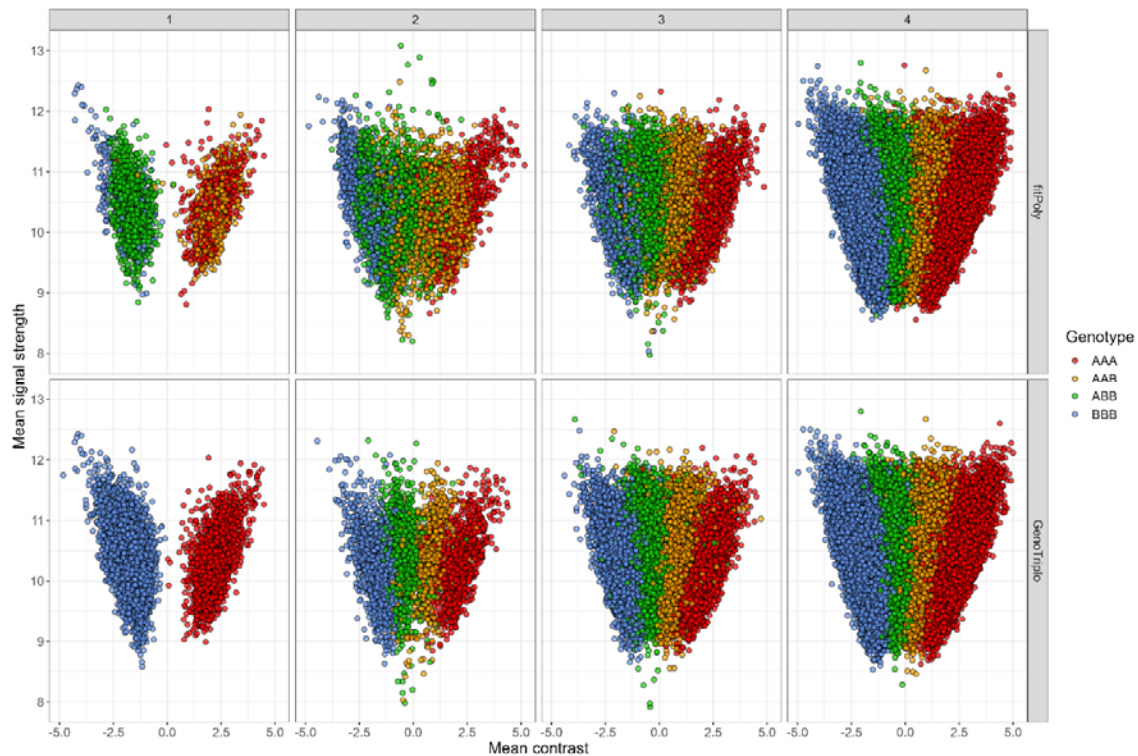

409

410 Figure 5: Mean contrast and signal strength values for genotypes of SNP with 1, 2, 3 and 4 different  
411 genotypes (from left to right) for fitPoly (above) and GenoTriplo (under) methods

412 When the numbers of possible genotypes were different across the two methods, two discernible  
 413 patterns emerged from the analysis based on visual observation of the clusters, showcasing scenarios  
 414 where fitPoly outperformed GenoTriplo and *vice versa* (Table 3). FitPoly showed better results in  
 415 categories where it identified a greater number of genotypes compared to GenoTriplo, specifically in  
 416 categories (2;3), (2;4), and (3;4). For these 3 categories however, the genotypes provided by  
 417 GenoTriplo closely matched those from fitPoly when ignoring NA calls, with concordance rates of  
 418 99%, 99%, and 97%, respectively. Notably, for 292 markers out of the 1,000 in the (3;4) category,  
 419 fitPoly identified a lone individual for the minor homozygous genotype, which GenoTriplo  
 420 categorized as NA.

421 Conversely, in categories where GenoTriplo exhibited superior performance (categories (1;2), (3;2),  
 422 (4,2), and (4,3)), fitPoly's genotypes deviated significantly from the expected outcomes, resulting in  
 423 concordance rates of 49%, 49%, 34%, and 40%, respectively.

424 In the (1;3) category, a balanced performance between the two methods was observed. When fitPoly  
 425 outperformed, GenoTriplo's genotypes closely matched fitPoly's (achieving 100% concordance after  
 426 removing all instances of "NA"). However, when GenoTriplo was better, only 30% of fitPoly's  
 427 genotypes aligned with the decisions made by GenoTriplo.

428 Table 3: Number of markers visualized per category, number best genotyped by GenoTriplo, by  
 429 fitPoly; and corresponding rate of concordant genotypes between methods.

| Category (GT;FP) | Number of markers        |                             |                          |                              | Rate of concordant genotypes for markers with |                          |
|------------------|--------------------------|-----------------------------|--------------------------|------------------------------|-----------------------------------------------|--------------------------|
|                  | Total visual observation | Best genotyping: GenoTriplo | Best genotyping: fitPoly | No best method or bad marker | Best genotyping: GenoTriplo                   | Best genotyping: fitPoly |
| (1;2)            | 1000                     | 946                         | 6                        | 48                           | 0.49                                          | 1                        |
| (1;3)            | 644                      | 330                         | 282                      | 32                           | 0.30                                          | 1                        |
| (2;3)            | 542                      | 61                          | 354                      | 127                          | 0.69                                          | 0.99                     |
| (2;4)            | 783                      | 37                          | 657                      | 89                           | 0.60                                          | 0.99                     |
| (3;2)            | 210                      | 126                         | 5                        | 79                           | 0.49                                          | 0.78                     |
| (3;4)            | 1000                     | 105                         | 784                      | 111                          | 0.89                                          | 0.97                     |
| (4;2)            | 640                      | 582                         | 0                        | 58                           | 0.34                                          | -                        |
| (4;3)            | 966                      | 841                         | 50                       | 75                           | 0.40                                          | 0.72                     |

430

431 When examining the SNP acceptance/rejection categorization, we found that GenoTriplo retained  
432 the majority of SNPs where fitPoly performed better, aligning with expectations due to the close  
433 similarity between GenoTriplo and fitPoly. However, most SNPs within the (2;4) category were  
434 rejected by GenoTriplo and no by fitPoly, particularly for call rate considerations. Notably, most  
435 markers rejected by fitPoly in these categories were also rejected by GenoTriplo.

436 In the case of SNPs where GenoTriplo exhibited superior performance, fitPoly retained nearly half of  
437 them, despite having low concordance with GenoTriplo. For instance, in the (1;2) category, out of the  
438 936 SNPs retained by GenoTriplo, 632 were also retained by fitPoly, even though they were likely  
439 incorrect, given the 50% concordance with GenoTriplo. Notably, almost every SNP rejected by  
440 GenoTriplo was also rejected by fitPoly.

#### 441 **Parentage assignment assessment by APIS**

442 To evaluate the genotyping performance for pedigree retrieval, we utilized the exclusion method of  
443 APIS (<https://cran.r-project.org/web/packages/APIS/index.html>) for parentage assignment of triploid  
444 offspring genotyped with the described method, alongside parents genotyped by AXAS software. All  
445 offspring were successfully assigned to a couple of parents belonging to the correct factorial mating  
446 plan.

447 For the best couples assigned, a maximum of 19 mismatches occurred among the 1000 markers, with  
448 a mean mismatch of 6.9, representing less than 1% of mismatches between parents and progeny (Fig  
449 6). The second-best couples exhibited a minimum of 47 mismatches, with a mean of 85.6. Therefore,  
450 a substantial gap in mismatch numbers existed between the best and second-best couples, with  
451 distributions clearly exhibiting no overlap, showing the very high quality of the assignments obtained  
452 (Fig 6).

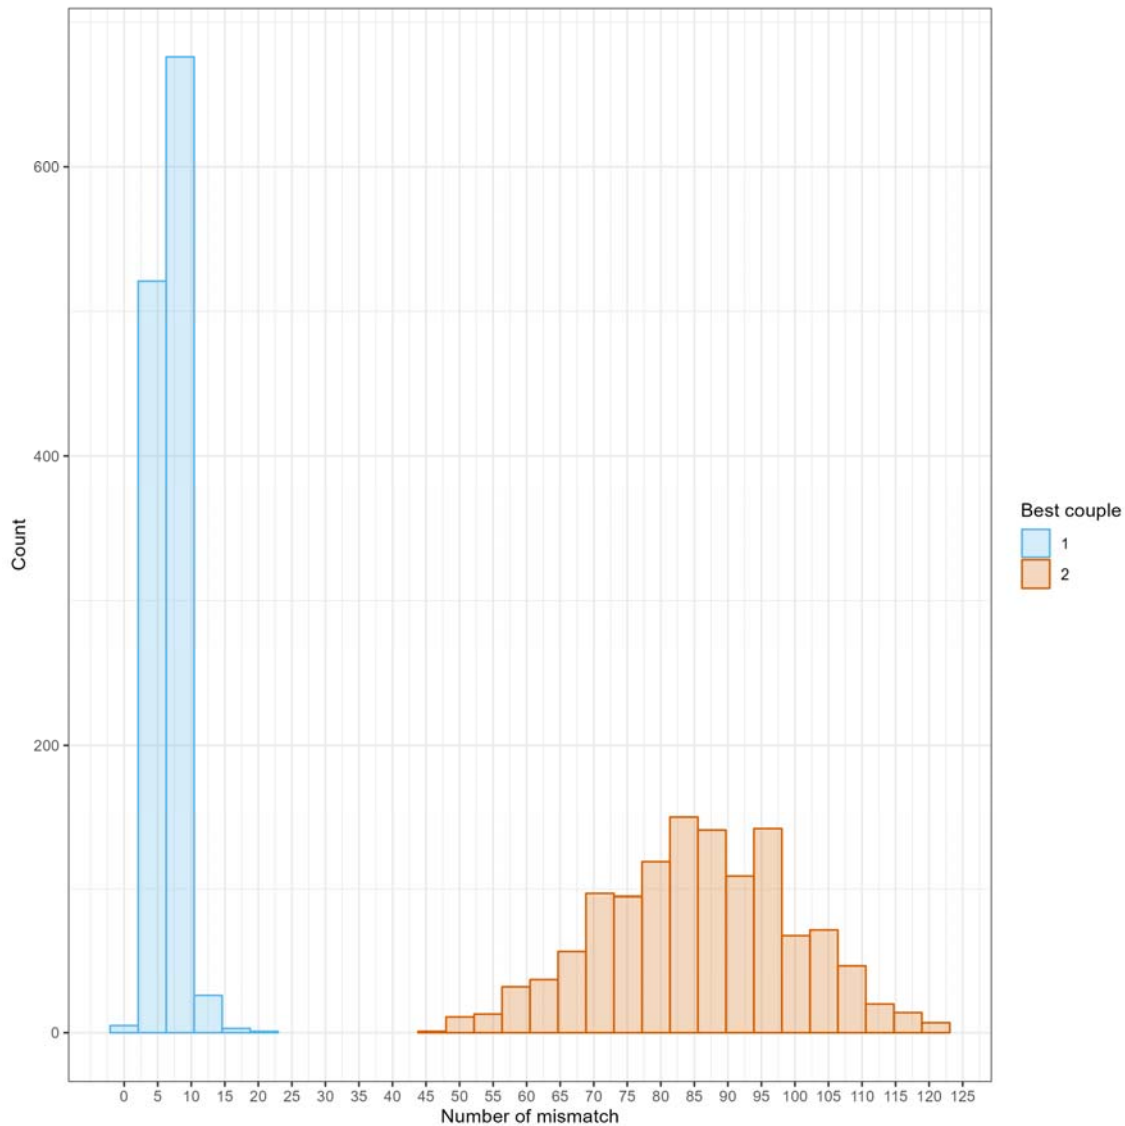

453

454 Figure 6: Number of offspring as a function of the number of mismatches for the best couple (blue)

455 and the second-best couple (red) found by APIS parentage assignment

456

## 457 Discussion

458 Our method for genotype calling of triploids from luminescence datasets demonstrated its quality to

459 genotype triploid fish, leading to its integration into the R package *GenoTriplo*, freely accessible to

460 the scientific community: <https://cran.r-project.org/web/packages/GenoTriplo/index.html>.

461 Our approach demonstrated a good accuracy for parentage assignment of triploid offspring with  
462 diploid parents. This was validated using the top 1000 markers based on MAF and Call Rate. The  
463 method performed well even with fewer markers or randomly selected markers (as few as 200).  
464 Although the true pedigree was unknown, the very low numbers of mismatches for the best couple  
465 suggested highly accurate assignments.

466 The method did not depend on prior information on genotype position relative to their own contrast  
467 value when identifying genotypes among SNP. This characteristic enhanced efficiency, particularly  
468 when contrast values were shifted from the expected values as a same genotype would manifest at  
469 different value of contrast dependant on the marker [24,25]. This also allows to genotype new SNPs  
470 with no need of human action to set reference genotypes for each SNP, in this way differentiating it  
471 from AXAS that relies on reference genotype.

472 The clustering method underlying the genotyping call was efficient using well-fitted input  
473 parameters. Notably, the number of initializations significantly enhanced the clustering algorithm's  
474 efficiency by identifying clusters with few individuals, i.e. representing low-frequency genotypes. In  
475 our case study, the occurrence of markers with low-frequency genotypes was limited, and most of  
476 the different genotypes were thus well-identified with only 5 initialization runs.

477 Increasing the number of initializations will maximize the probability of identifying clusters  
478 corresponding to low-frequency genotypes. However, this increase results in longer computation  
479 time, forcing a trade-off between computation time and additional identification of very low-  
480 frequency genotype for few SNPs. In our case, using 5 initializations was a good compromise, but this  
481 parameter should be optimized for other triploid populations and species.

482 In addition, the initial number of clusters also significantly influenced the clustering algorithm  
483 outcomes. Requesting only 4 clusters for triploids resulted in miss-detection of low-frequency  
484 genotypes, leading to a shortage of “Poly high resolution” SNPs and an excess of “No minor  
485 homozygote” markers. Conversely, too high a number of clusters led to inappropriate creation of



486 clusters composed of very few individuals, and resulting in a scarcity of the “Mono high resolution”  
487 category. Optimal results were achieved with an intermediate number of clusters, specifically twice  
488 the number of possible genotypes (8 for triploids). This configuration allowed for the identification of  
489 most of the low-frequency genotypes without generating artefacts. Therefore, our strategy using  
490 twice the maximum number of possible genotypes facilitated genotype calling for low-frequency  
491 genotypes without the need for of large number of individuals to genotype together as suggested by  
492 [23,24].

493 In the genotyping process, the method employed assumed that individuals originated from the same  
494 population. Using Hardy-Weinberg hypothesis, our approach did not accept that both homozygous  
495 genotypes coexisted without the two heterozygous genotypes for a given SNP, contributing to the  
496 efficiency of our genotype attribution. When informed that the samples can come from various  
497 populations, our method involved the comparison of mean contrast values of each current cluster to  
498 the values of reference clusters. Those reference values are derived on the same dataset from  
499 markers with the maximum number of genotypes. Given the common occurrence of contrast value  
500 shifts (when all contrast values of a SNP are all shifted toward positive or negative value), the  
501 recommended approach, when possible, is to analyse together pools of individuals originated from  
502 the same population.

503 The overall concordance of genotypes between GenoTriplo and fitPoly was notably high. However,  
504 differences emerged when comparing the number of genotypes identified by each method. When  
505 both methods identified the same number of genotypes, differences were the result of the  
506 fundamentally different approaches to assigning genotypes to clusters of individuals. GenoTriplo  
507 relied on stringent assumptions, like assigning a homozygous genotype when only one cluster was  
508 identified. In contrast, fitPoly lacked such guidelines, leading to substantial discordance, especially in  
509 cases where only one genotype was expected.

510 GenoTriplo encountered difficulties in identifying all 4 genotypes, often settling for 3 when very few  
511 individuals formed the second homozygous genotype. Those few individuals usually were not  
512 assigned a genotype, avoiding genotyping errors. Besides, for 292 markers among the 784 markers  
513 where fitPoly identified 4 genotypes while GenoTriplo found only 3, a single individual represented  
514 the homozygous low frequency genotype in FitPoly. The credibility being low for a single individual to  
515 represent a genotype, we consider it preferable to assign the individual to NA, thus avoiding a  
516 possible genotyping error.

517 On the contrary, fitPoly faced difficulties in identifying a limited number of genotypes (below the  
518 maximum possible) for a given SNP, particularly when the SNP was monomorphic. This challenge  
519 could come from the method per se which prioritizes a high number of genotypes, leading to the  
520 creation of unwanted clusters. While some of these SNP were rejected by fitPoly for excess of NA,  
521 half were retained even for those with low concordance with GenoTriplo, causing substantial  
522 genotyping errors.

523 While most of the disagreement were minor when fitPoly performed better, GenoTriplo's accuracy  
524 outperformed fitPoly's, especially for low number of genotypes and detection of wrong genotypes.

525 This paper focuses on the genotyping of triploids, but it is essential to note that the method was also  
526 successfully tested on diploids, providing similar results to the AXAS software. Furthermore, its  
527 application could potentially be extended to higher ploidy levels. The key parameter for the  
528 clustering phase would be the minimal distance between two clusters. Notably, the mean contrast  
529 value for a homozygous diploid genotype matched that of a triploid homozygous genotype.  
530 Consequently, with higher ploidy levels, the insertion of additional heterozygote genotypes is  
531 expected between the contrast values of homozygotes, resulting in diminishing distances between  
532 clusters as ploidy levels increase, making the discrimination between different allelic dosages more  
533 difficult. Currently, the genotyping phase is implemented for diploid and triploid individuals, and  
534 further work would be required to extend it to higher ploidy levels.

## 535 **Data availability statement**

536 The GenoTriplo package is available on the CRAN at [https://cran.r-](https://cran.r-project.org/web/packages/GenoTriplo/index.html)  
537 [project.org/web/packages/GenoTriplo/index.html](https://cran.r-project.org/web/packages/GenoTriplo/index.html)

538 The data supporting the article are available at: <https://doi.org/10.57745/7IMQDS>

## 539 **Acknowledgment**

540 The work was partly supported financially by the French Government (FranceAgrimer) and the  
541 European Maritime and Fisheries Fund (EMFF) in the R&D project HypoTemp (action n° P  
542 FEA470019FA1000016).

543 Authors are indebted to Dominique Charles, Alexandre Desgranges and Jean Ruche from the  
544 Aquaculteurs Bretons trout selective breeding company (Plouigneau, France) for the fish production,  
545 and to Charles Poncet and his team for the genotyping of all fish for HypoTemp project.

## 546 **Bibliography**

- 547 1. Adams KL, Wendel JF. Polyploidy and genome evolution in plants. *Current Opinion in Plant*  
548 *Biology*. 2005 Apr;8(2):135–41.
- 549 2. Nishiwaki A, Mizuguti A, Kuwabara S, Toma Y, Ishigaki G, Miyashita T, et al. Discovery of natural  
550 *Miscanthus* (Poaceae) triploid plants in sympatric populations of *Miscanthus sacchariflorus* and  
551 *Miscanthus sinensis* in southern Japan. *American Journal of Botany*. 2011 Jan 1;98(1):154–9.
- 552 3. Soltis PS, Marchant DB, Van De Peer Y, Soltis DE. Polyploidy and genome evolution in plants.  
553 *Current Opinion in Genetics & Development*. 2015 Dec;35:119–25.
- 554 4. Gregory TR, Mable BK. Polyploidy in Animals. In: *The Evolution of the Genome* [Internet].  
555 Elsevier; 2005 [cited 2023 Sep 12]. p. 427–517. Available from:  
556 <https://linkinghub.elsevier.com/retrieve/pii/B9780123014634500103>
- 557 5. Gmitter FG, Ling XB, Deng XX. Induction of triploid Citrus plants from endosperm calli in vitro.  
558 *Theoret Appl Genetics*. 1990 Dec;80(6):785–90.
- 559 6. Wang X, Cheng ZM, Zhi S, Xu F. Breeding triploid plants: a review. *Czech J Genet Plant Breed*.  
560 2016 Jun 30;52(2):41–54.
- 561 7. Sheehan RJ, Shasteen SP, Suresh AV, Kapuscinski AR, Seeb JE. Better Growth in All-Female  
562 Diploid and Triploid Rainbow Trout. *Transactions of the American Fisheries Society*. 1999 May  
563 1;128(3):491–8.

- 564 8. Nell JA. Farming triploid oysters. *Aquaculture*. 2002 Jul 31;210(1):69–88.
- 565 9. Piferrer F, Beaumont A, Falguière JC, Flajšhans M, Haffray P, Colombo L. Polyploid fish and  
566 shellfish: Production, biology and applications to aquaculture for performance improvement and  
567 genetic containment. *Aquaculture*. 2009 Aug;293(3–4):125–56.
- 568 10. Benfey TJ. Effectiveness of triploidy as a management tool for reproductive containment of  
569 farmed fish: Atlantic salmon (*Salmo salar*) as a case study. *Rev Aquacult*. 2016 Sep;8(3):264–82.
- 570 11. Thomas TD, Chaturvedi R. Endosperm culture: a novel method for triploid plant production.  
571 *Plant Cell Tiss Organ Cult*. 2008 Apr;93(1):1–14.
- 572 12. Thomas TD, Bhatnagar AK, Bhojwani SS. Production of triploid plants of mulberry (*Morus alba* L)  
573 by endosperm culture. *Plant Cell Reports*. 2000 Mar 13;19(4):395–9.
- 574 13. Stanley JG, Allen SK, Hidu H. Polyploidy induced in the American oyster, *Crassostrea virginica*,  
575 with cytochalasin B. *Aquaculture*. 1981 Apr;23(1–4):1–10.
- 576 14. Chourrout D. Thermal induction of diploid gynogenesis and triploidy in the eggs of the rainbow  
577 trout (*Salmo gairdneri* Richardson). *Reprod Nutr Dévelop*. 1980;20(3A):727–33.
- 578 15. Lincoln RF, Scott AP. Production of all-female triploid rainbow trout. *Aquaculture*. 1983 Jan;30(1–  
579 4):375–80.
- 580 16. Blanc JM, Poisson H, Vallée F. Covariation between diploid and triploid progenies from common  
581 breeders in rainbow trout, *Oncorhynchus mykiss* (Walbaum): Familial covariation between di-  
582 and triploid trout. *Aquaculture Research*. 2001 Jul;32(7):507–16.
- 583 17. Friars GW, McMillan I, Quinton VM, O’Flynn FM, McGeachy SA, Benfey TJ. Family differences in  
584 relative growth of diploid and triploid Atlantic salmon (*Salmo salar* L.). *Aquaculture*. 2001  
585 Jan;192(1):23–9.
- 586 18. Leeds TD, Vallejo RL, Weber GM, Gonzalez-Pena D, Silverstein JT. Response to five generations of  
587 selection for growth performance traits in rainbow trout (*Oncorhynchus mykiss*). *Aquaculture*.  
588 2016 Dec;465:341–51.
- 589 19. Vandeputte M, Haffray P. Parentage assignment with genomic markers: a major advance for  
590 understanding and exploiting genetic variation of quantitative traits in farmed aquatic animals.  
591 *Front Genet* [Internet]. 2014 Dec 12 [cited 2023 Sep 7];5. Available from:  
592 <http://journal.frontiersin.org/article/10.3389/fgene.2014.00432/abstract>
- 593 20. LaFramboise T. Single nucleotide polymorphism arrays: a decade of biological, computational  
594 and technological advances. *Nucleic Acids Research*. 2009 Jul 1;37(13):4181–93.
- 595 21. You Q, Yang X, Peng Z, Xu L, Wang J. Development and Applications of a High Throughput  
596 Genotyping Tool for Polyploid Crops: Single Nucleotide Polymorphism (SNP) Array. *Front Plant*  
597 *Sci*. 2018 Feb 6;9:104.
- 598 22. Pereira GS, Garcia AAF, Margarido GRA. A fully automated pipeline for quantitative genotype  
599 calling from next generation sequencing data in autopolyploids. *BMC Bioinformatics*. 2018  
600 Dec;19(1):398.

- 601 23. Rabbee N, Speed TP. A genotype calling algorithm for affymetrix SNP arrays. *Bioinformatics*.  
602 2006 Jan 1;22(1):7–12.
- 603 24. Shah TS, Liu JZ, Floyd JAB, Morris JA, Wirth N, Barrett JC, et al. optiCall: a robust genotype-calling  
604 algorithm for rare, low-frequency and common variants. *Bioinformatics*. 2012 Jun  
605 15;28(12):1598–603.
- 606 25. Teo YY, Inouye M, Small KS, Gwilliam R, Deloukas P, Kwiatkowski DP, et al. A genotype calling  
607 algorithm for the Illumina BeadArray platform. *Bioinformatics*. 2007 Oct 15;23(20):2741–6.
- 608 26. Grashei KE, Ødegård J, Meuwissen THE. Genotype calling of triploid offspring from diploid  
609 parents. *Genet Sel Evol*. 2020 Dec;52(1):15.
- 610 27. Voorrips RE, Gort G, Vosman B. Genotype calling in tetraploid species from bi-allelic marker data  
611 using mixture models. *BMC Bioinformatics*. 2011 Dec;12(1):172.
- 612 28. Zych K, Gort G, Maliepaard CA, Jansen RC, Voorrips RE. FitTetra 2.0 – improved genotype calling  
613 for tetraploids with multiple population and parental data support. *BMC Bioinformatics*. 2019  
614 Dec;20(1):148.
- 615 29. Prchal M, D’Ambrosio J, Lagarde H, Lallias D, Patrice P, François Y, et al. Genome-wide  
616 association study and genomic prediction of tolerance to acute hypoxia in rainbow trout.  
617 *Aquaculture*. 2023 Feb;565:739068.
- 618 30. Palti Y, Gao G, Liu S, Kent MP, Lien S, Miller MR, et al. The development and characterization of a  
619 57K single nucleotide polymorphism array for rainbow trout. *Molecular Ecology Resources*.  
620 2015;15(3):662–72.
- 621 31. D’Ambrosio J, Phocas F, Haffray P, Bestin A, Brard-Fudulea S, Poncet C, et al. Genome-wide  
622 estimates of genetic diversity, inbreeding and effective size of experimental and commercial  
623 rainbow trout lines undergoing selective breeding. *Genetics Selection Evolution*. 2019 Jun  
624 6;51(1):26.
- 625 32. Bernard M, Dehaullon A, Gao G, Paul K, Lagarde H, Charles M, et al. Development of a High-  
626 Density 665 K SNP Array for Rainbow Trout Genome-Wide Genotyping. *Front Genet*. 2022 Jul  
627 18;13:941340.
- 628 33. Lebret R. Rmixmod: A MIXture MODelling R package. In: 1ères Rencontres R [Internet].  
629 Bordeaux, France; 2012 [cited 2023 Sep 12]. Available from: <https://hal.science/hal-00717551>
- 630 34. R Core Team. R: A Language and Environment for Statistical Computing [Internet]. Vienna,  
631 Austria: R Foundation for Statistical Computing; 2023. Available from: [https://www.R-](https://www.R-project.org/)  
632 [project.org/](https://www.R-project.org/)
- 633 35. Affymetrix. Axiom® Genotyping Solution.
- 634 36. Vandeputte M. An accurate formula to calculate exclusion power of marker sets in parentage  
635 assignment. *Genet Sel Evol*. 2012 Dec;44(1):36.
- 636 37. Wickham H. ggplot2: ggplot2. *WIREs Comp Stat*. 2011 Mar;3(2):180–5.
